# Supplementary material for: Towards models of the oxygen-evolving complex (OEC) of photosystem II: a Mn4Ca cluster of relevance to low oxidation states of the OEC
Source: Royal Society of Chemistry journal article supplement (doi:10.1039/c1cc13770k), 2011-01-01
Supplement: c1cc13770k.pdf [file c1cc13770k.pdf]

## ELECTRONIC SUPPORTING INFORMATION

### **Towards models of the oxygen-evolving complex (OEC) of photosystem II: A Mn<sub>4</sub>Ca cluster of relevance to low oxidation states of the OEC**

*Evangelia S. Koumoussi,<sup>a</sup> Shreya Mukherjee,<sup>b</sup> Christine M. Beavers,<sup>c</sup> Simon J. Teat,<sup>c</sup>  
George Christou<sup>\*b</sup> and Theocharis C. Stamatatos<sup>\*a,d</sup>*

---

<sup>a</sup> Department of Chemistry, University of Patras, 26500 Patras, Greece. Fax: +30-2610-997118; Tel: +30-2610-996020; E-mail: thstama@chemistry.upatras.gr

<sup>b</sup> Department of Chemistry, University of Florida, Gainesville, Florida 32611-7200, USA.

<sup>c</sup> Advanced Light Source, Lawrence Berkeley National Laboratory, 1 Cyclotron Road, Mail Stop 2-400, Berkeley, CA 94720, USA.

<sup>d</sup> Department of General and Inorganic Chemistry, Faculty of Chemistry, Aristotle University of Thessaloniki, P.O. Box 135, 54124 Thessaloniki, Greece.

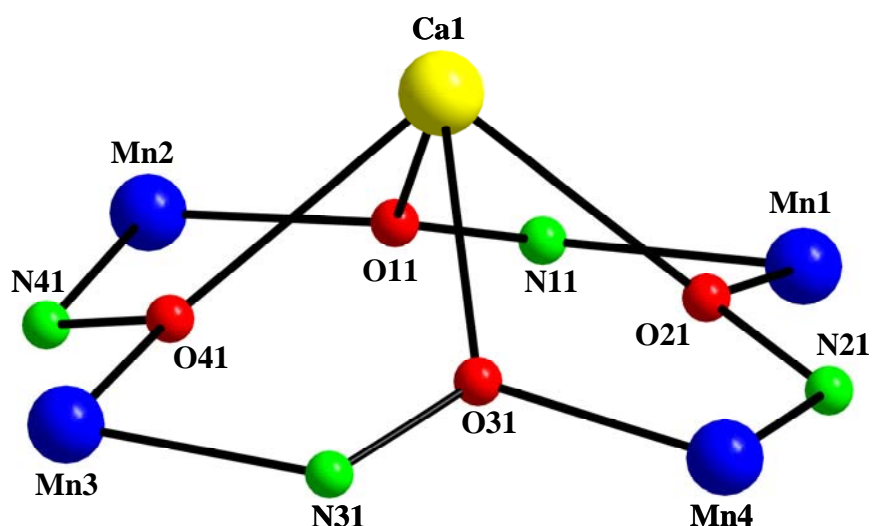

**Fig. S1** Labeled PovRay representation of the complete  $[\text{Mn}_4\text{Ca}(\mu\text{-NO})_4]^{10+}$  core of **1**.  
Color scheme: Ca, yellow;  $\text{Mn}^{\text{III}}$ , blue; O, red; N, green.

The Mn-Mn-Mn, Mn-Mn-Ca, and Mn-Ca-Mn angles are in the ranges  $89.5(2)$ - $90.6(2)^\circ$ ,  $51.6(3)$ - $52.3(3)^\circ$ , and  $75.9(4)$ - $123.3(5)^\circ$ , respectively. The  $\text{Ca}^{\text{II}}$  atom lies  $1.804 \text{ \AA}$  out of the  $\text{Mn}_4$  plane. All Ca-O bonds are in the range  $2.346(4)$ - $2.465(4) \text{ \AA}$ .

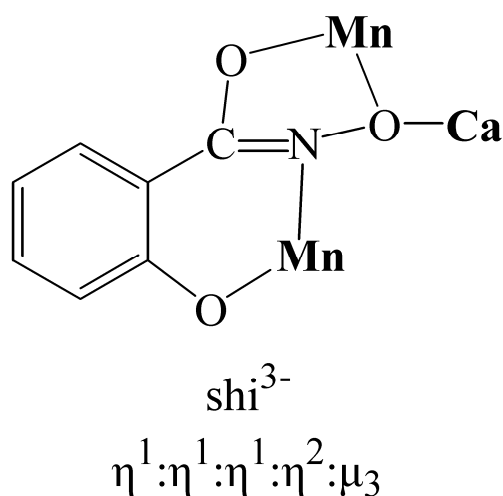

**Fig. S2** The coordination mode of  $\text{shi}^{3-}$  ligand in complex **1**.

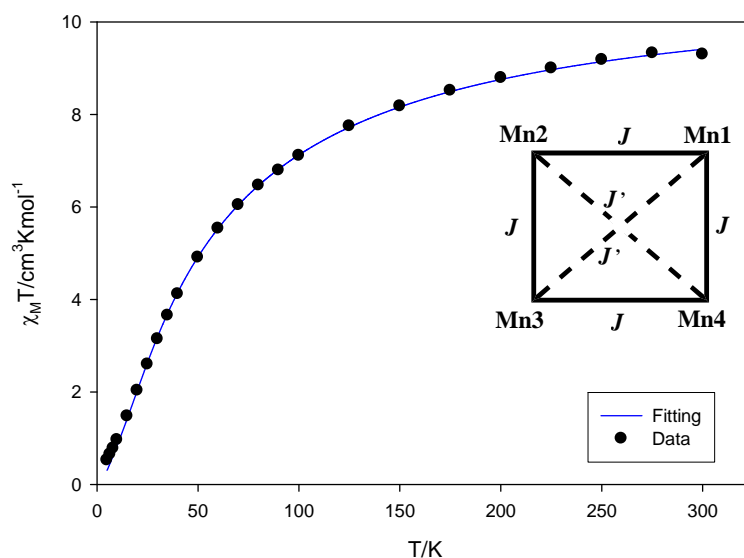

**Fig. S3**  $\chi_M T$  vs  $T$  plot for **1**·CH<sub>2</sub>Cl<sub>2</sub>. The blue solid line is the fit of the data. Inset: 2- $J$  coupling scheme for **1**.

The fit (solid blue line in Fig. S3) gave fit parameter values ( $\mathcal{H} = -2J\hat{S}_i \cdot \hat{S}_j$  convention) of  $J = -3.33(5) \text{ cm}^{-1}$ ,  $J' = -1.15(9) \text{ cm}^{-1}$ , and  $g = 1.91(2)$ , indicating an  $S = 0$  ground state and an  $S = 1$  first excited state at  $6.66 \text{ cm}^{-1}$  higher in energy. A temperature-independent paramagnetism (TIP) term was included, held fixed at  $200 \times 10^{-6} \text{ cm}^3 \text{ mol}^{-1}$ . The agreement factor was  $R^2 = 0.99$ .
